**TITLE:** EFFECTS OF ESMOLOL (E) ON PULMONARY REACTIVITY IN BASENJI-GREYHOUNDS (BG).  
**AUTHORS:** JD Tobias MD, RA Sauder MD  
CA Hirshman MD.  
**AFFILIATION:** Depts. of Anesthesiology\CCM and EHS, Johns Hopkins University, Baltimore, MD.

$\beta$ -adrenergic antagonists are frequently used in the perioperative period to control heart rate and blood pressure. Although these drugs are generally safe and effective, non-selective  $\beta$ -antagonists can provoke bronchospasm in patients with asthma. E is a short acting  $\beta$ -1 selective antagonist which may be safer than nonselective beta blockers in these patients. To further investigate this issue, we compared the effect of equipotent doses of propranolol (P) and E on pulmonary reactivity in BG dogs.

Seven BG dogs were anesthetized with thiopental and fentanyl (TF) and studied during three conditions: (1) control-TF anesthesia, (2) TF plus P, and (3) TF plus E. The three studies were performed in random order on separate days. After intubation and mechanical ventilation, pulmonary resistance ( $R_L$ ) was calculated from simultaneous pressure and flow curves. P was administered as a bolus dose of 2 mg/kg. This dose was based on previous studies in these dogs. An equipotent dose of E was determined from a standardized isoproterenol sensitivity test which was performed on a separate day. E was administered as a bolus dose of 1 mg/kg followed by a continuous infusion of 0.4-0.5 mg/kg/min. Aerosol challenges consisted of increasing doses of methacholine

(0.03, .075, .15, .3, .75, 3.0 mg/ml). Data were analyzed using 2-way ANOVA.

Both E and P significantly decreased heart rate from baseline ( $p < 0.01$ ). Baseline heart rate was  $162 \pm 8.4$  beats/minute and decreased to  $103 \pm 4.4$  after P and to  $98 \pm 3.8$  after E. P significantly increased  $R_L$  at all concentrations of MCH when compared to control while E did not (see figure). During the 3 conditions (control, TF+P, and TF+E) MCH 0.3 mg/ml increased  $R_L$  (cm H<sub>2</sub>O/L/sec) from baseline:  $4.4 \pm .89$ ,  $7.9 \pm .97$ , and  $4.0 \pm .39$  respectively. These data suggest that in clinically applicable dose ranges, E is devoid of pulmonary effects in the BG model of asthma. Our study suggests that E is preferable to P in patients with reactive airway disease. Supported by NIH 38435.

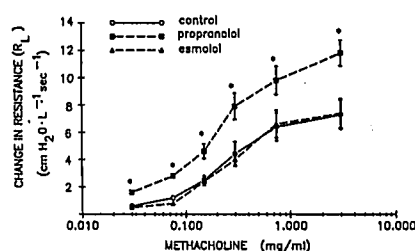

Fig. 1: The effect of propranolol and esmolol on airway responsiveness to MCH in BG dogs.

A1195

**TITLE:** REDUCED SENSITIVITY TO BETA-ADRENERGIC AGONISTS IS REVERSED BY METHYLPREDNISOLONE.  
**AUTHORS:** RA Sauder MD, JD Tobias MD, CA Hirshman MD.  
**AFFILIATION:** Depts. of Anesthesiology\CCM and EHS, Johns Hopkins University, Baltimore, MD.

Although corticosteroids have become the mainstay of asthma therapy, the mechanism by which these drugs act in asthma is unknown. Basenji-greyhound dogs (BG), similar to humans with asthma, show a reduced sensitivity to  $\beta$ -adrenergic agonists in response to methacholine(MCH) challenge both *in vitro* and *in vivo*. To study the influence of corticosteroids on airway responsiveness, we investigated the effect of chronic methylprednisolone (MP) treatment (2 mg/kg/day) on altering the airway responses to MCH challenge in BG dogs pretreated with albuterol (A).

Five BG dogs were studied on 4 occasions during thiopental-fentanyl anesthesia, in random order. Airway responsiveness to MCH, alone and in the presence of A (1  $\mu$ g/kg IV bolus), were determined prior to treatment with MP (control) and after 2 weeks of subcutaneous MP. Aerosol challenge consisted of 5 standardized breaths with increasing concentrations of MCH (.03, .075, .15, .3, .75, 3.0, and 10.0 mg/ml). Pulmonary resistance ( $R_L$ ) was calculated from simultaneous pressure and flow measurements at points of zero flow. Transpulmonary pressure was estimated as the difference between the pressure measurements of an esophageal balloon and a needle in the airway.

Maximal changes in  $R_L$  were recorded after each MCH challenge. Data were analyzed by two way ANOVA and expressed as the ratio of post challenge to pre challenge  $R_L$ .

Chronic MP treatment did not alter airway responsiveness to MCH. However, the combination of A and chronic MP significantly attenuated ( $p < 0.05$ ) the pulmonary response to MCH. During the 4 study conditions (C, A, MP, A+MP) MCH .75 mg/ml, altered airway responsiveness from baseline: (mean  $\pm$  SEM)  $3.60 \pm 0.58$ ,  $4.28 \pm 0.42$ ,  $4.19 \pm 0.68$ ,  $1.25 \pm 0.05$  fold respectively ( $p < 0.01$ ).

We conclude that chronic MP treatment reverses the insensitivity to  $\beta$ -adrenergic agonists, *in vivo*, in BG dogs. These data suggest that corticosteroids should be part of the premedication for asthmatic patients who may require beta-adrenergic agonists intraoperatively. Supported by NIH HL 38435.

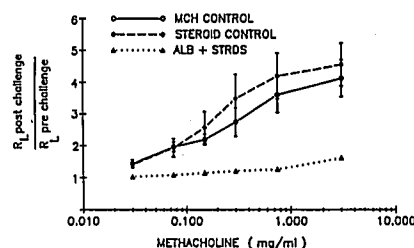

Fig. 1: The effect of albuterol (1 $\mu$ g/kg) on MCH challenge in steroid treated BG dogs.
